# Supplementary material for: Association of Gout With Long‐Term Cardiovascular Outcomes Among Patients With Obstructive Coronary Artery Disease
Source: PubMed Central journal article supplement — J Am Heart Assoc. 2018 Aug 17;7(16):e009328. doi: 10.1161/JAHA.118.009328 (PMC6201404; doi:10.1161/jaha.118.009328), 2018-08-17

# **Supplemental Material**



---

carotid bruits, history of chronic obstructive pulmonary disease, body mass index, congestive heart failure severity class [ $\leq 2$  weeks pre-cath], history of smoking, ventricular gallop, history of renal disease, baseline estimated glomerular filtration rate [Chronic Kidney Disease Epidemiology Collaboration], any valvular heart disease, hypertension, systolic blood pressure, year of index cath, history of liver disease, number of diseased vessels, left main stenosis  $\geq 50\%$ , acute coronary syndrome status, baseline use of aspirin, angiotensin-converting enzyme inhibitor/angiotensin receptor blocker, or statin therapy).

**Table S2. Association between Gout at Baseline OR during Follow-up and Cause-specific Mortality.**

| <b>Endpoint</b>         | <b>Unadjusted<br/>HR (95% CI)</b> | <b>Unadjusted<br/>p-value</b> | <b>Adjusted*<br/>HR (95% CI)</b> | <b>Adjusted*<br/>p-value</b> |
|-------------------------|-----------------------------------|-------------------------------|----------------------------------|------------------------------|
| Fatal MI                | 1.46 (1.01,2.10)                  | 0.042                         | 0.93 (0.631,1.38)                | 0.726                        |
| Sudden cardiac death    | 1.45 (1.09,1.95)                  | 0.012                         | 1.10 (0.81,1.50)                 | 0.547                        |
| Heart failure death     | 3.86 (2.69,5.54)                  | <.001                         | 2.42 (1.64,3.57)                 | <.001                        |
| Cardiac procedure death | 1.37 (0.81,2.30)                  | 0.240                         | 1.07 (0.62,1.84)                 | 0.810                        |
| Other cardiac death     | 1.86 (1.66,2.08)                  | <.001                         | 1.25 (1.11,1.41)                 | <.001                        |
| Non-cardiac death       | 1.53 (1.40,1.67)                  | <.001                         | 1.21 (1.10,1.33)                 | <.001                        |
| Unknown cause of death  | 1.514 (1.174,1.954)               | 0.001                         | 1.03 (0.77,1.36)                 | 0.865                        |

CV indicates cardiovascular; MI, myocardial infarction

\*Adjusted for age, sex, race, prior medical history (including prior MI, coronary artery bypass grafting, congestive heart failure, congestive heart failure severity class, cerebrovascular disease, peripheral vascular disease, diabetes, carotid bruits, history of chronic obstructive pulmonary disease, body mass index, congestive heart failure severity class [ $\leq 2$  weeks pre-cath], history of smoking, ventricular gallop, history of renal disease, baseline estimated glomerular filtration rate [Chronic Kidney Disease Epidemiology

---

Collaboration], any valvular heart disease, hypertension, systolic blood pressure, year of index cath, history of liver disease, number of diseased vessels, left main stenosis  $\geq 50\%$ , acute coronary syndrome status, baseline use of aspirin, angiotensin-converting enzyme inhibitor/angiotensin receptor blocker, or statin therapy).

**Figure S1. Cumulative Incidence Curves for CV death by Baseline Gout Status.**

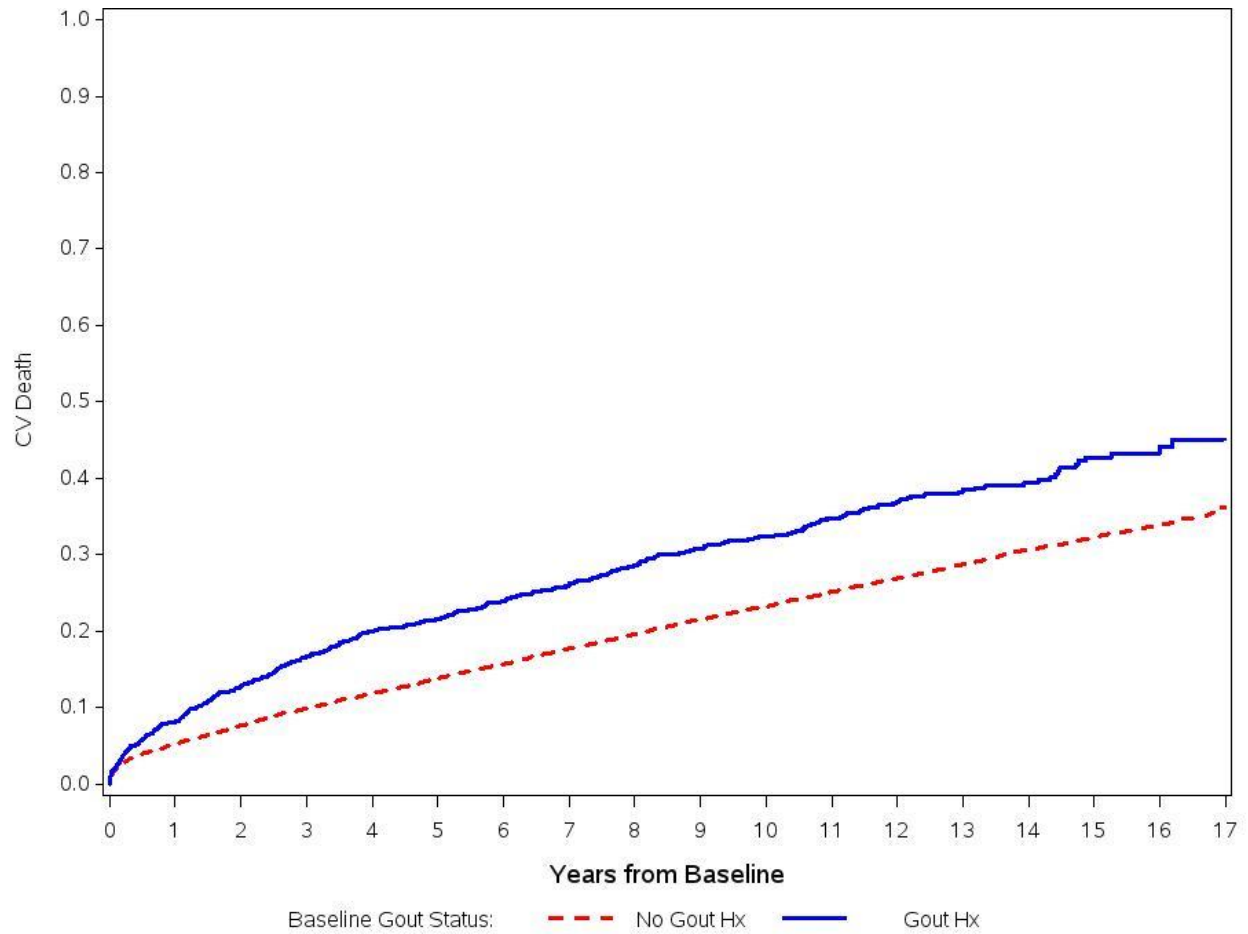

**Figure S2. Cumulative Incidence Curves for All-cause Mortality by Baseline Gout Status.**

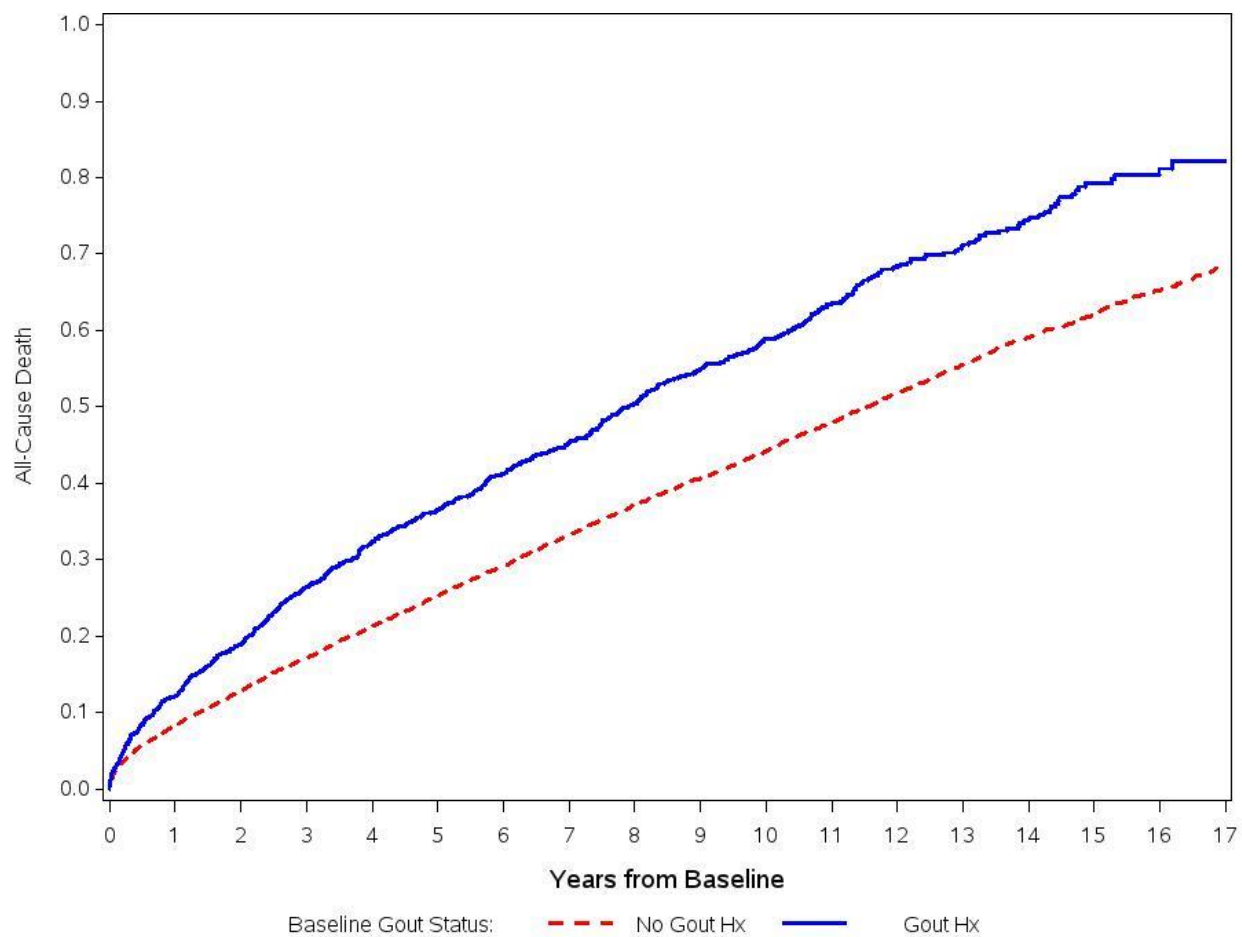

Supplement: JAH3-7-e009328-s001.pdf [file JAH3-7-e009328-s001.pdf]
